# Supplementary material for: Convergent evolution of marine mammals is associated with distinct substitutions in common genes
Source: PubMed Central journal article supplement (PMC4637874; doi:10.1038/srep16550), 2015-11-09
Supplement: srep16550-s1.pdf [file srep16550-s1.pdf]

## **Supplementary Information**

### **Convergent evolution of marine mammals is associated with distinct substitutions in common genes**

Xuming Zhou, Inge Seim, Vadim N. Gladyshev

**This file contains Supplementary Figures S1-S10 and Supplementary Tables S1-S6**

## Supplementary Figures

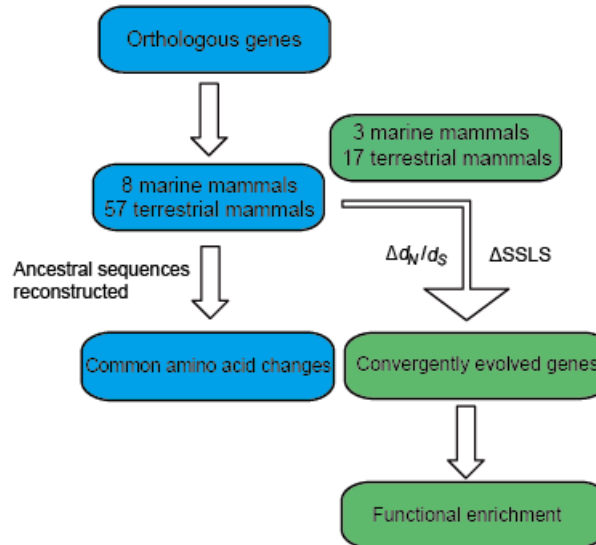

**Supplementary Figure S1.** Analysis pipeline in the present study. To identify common sequence changes in marine mammals, we utilized genomic data for 8 marine and 57 terrestrial mammals with completed genomes (shown in blue). To identify rapidly and convergently evolved genes, we subjected 3 marine and 17 terrestrial mammals to  $\Delta d_N/d_S$  and  $\Delta SSLS$  tests (shown in green).

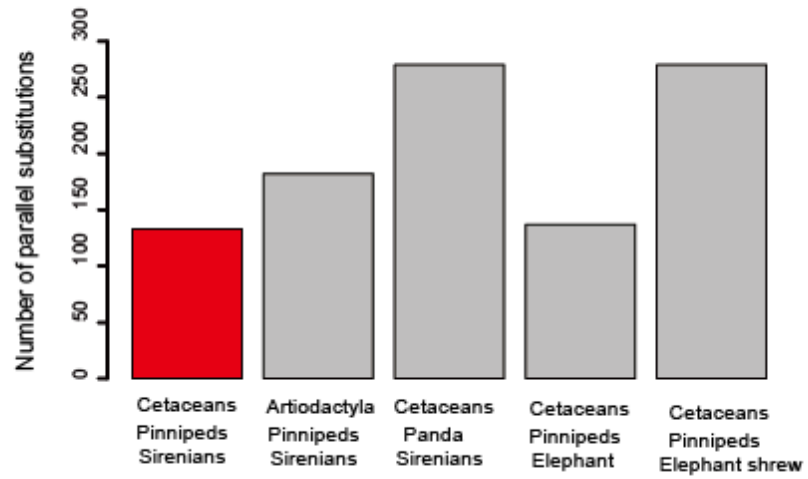

**Supplementary Figure S2.** Number of parallel substitution in the three marine lineages and in the combination of any two marine lineages with their sister terrestrial taxa.



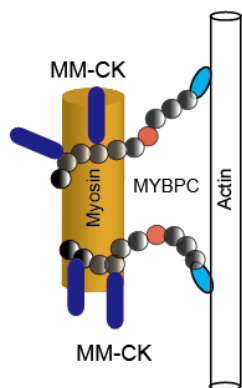

**Supplementary Figure S4.** Schematic representation of MYBPC protein geometry and its functional association with MM-CK (muscle-type creatine kinase). Domains are represented as black circles (with the domain containing the common change in marine mammals in red). The myosin filament backbone is shown in yellow, and MM-CK in blue.

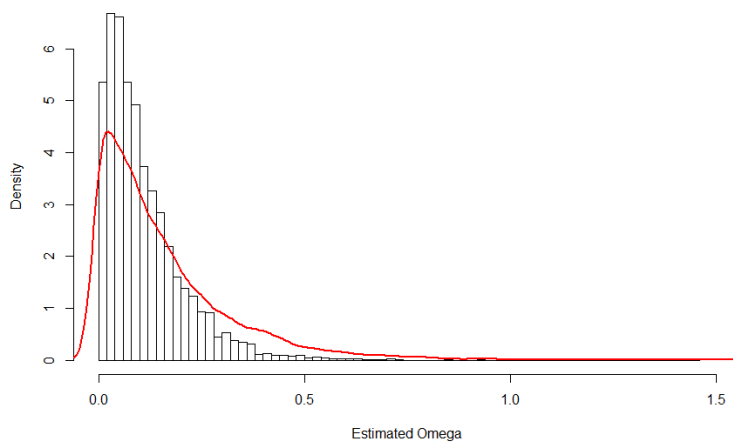

**Supplementary Figure S5.** Distribution of omega ( $d_N/d_S$ ) values for 5,585 genes in the present study. Bars denote background (terrestrial mammals), and red lines denote the foreground branch (marine mammals).

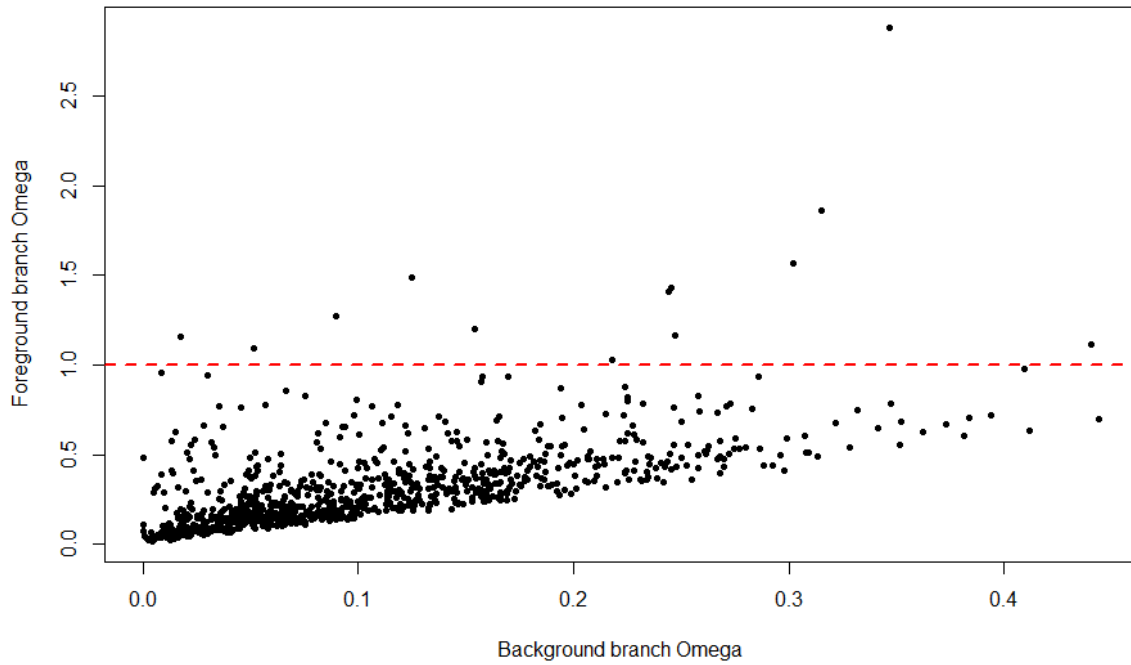

**Supplementary Figure S6.** Plot of omega ( $d_N/d_S$ ) values for the 907 rapidly evolved genes in foreground branch (marine mammals) versus background branch (terrestrial mammals). Red line denotes the  $d_N/d_S$  values equal to one.

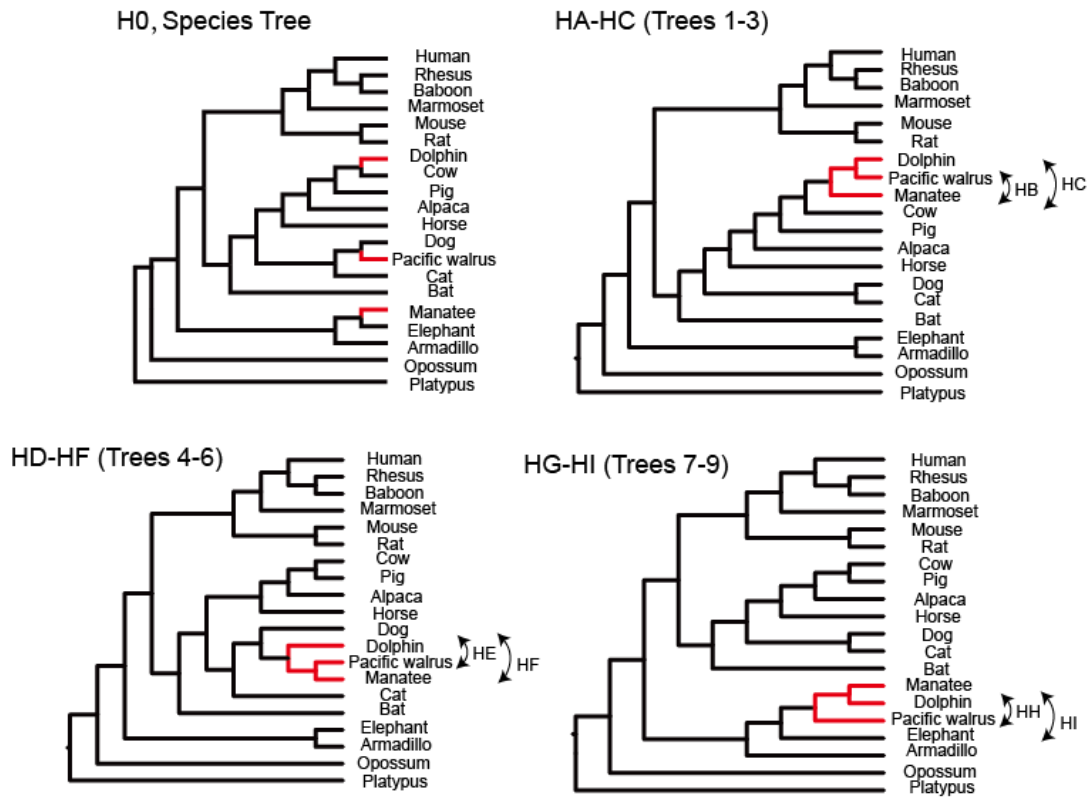

**Supplementary Figure S7.** Null hypothesis (species tree) and other 9 alternative hypotheses (Trees 1-9) examined in the likelihood convergence analyses.

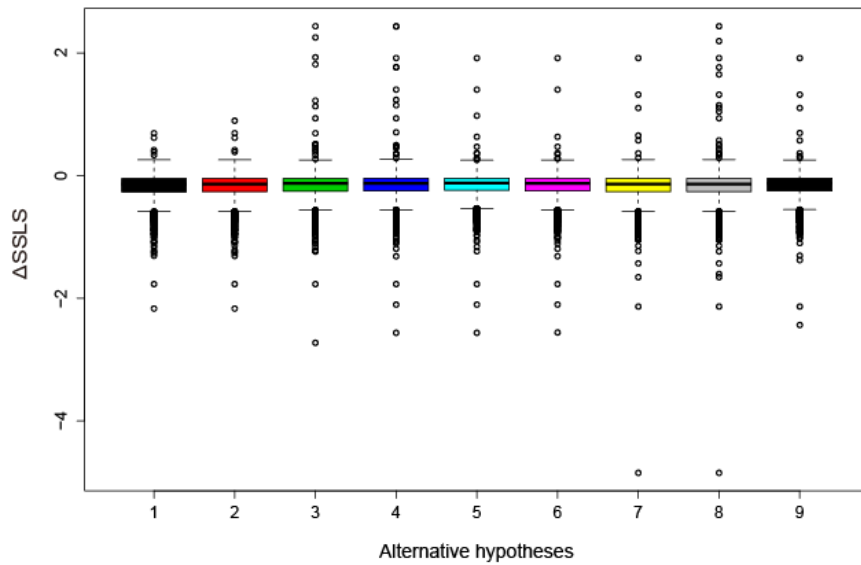

**Supplementary Figure S8.** Statistic of  $\Delta$ SSLS values for 9 alternative topologies (Trees 1-9) which constraint the monophyly of marine mammals examined in the present study.

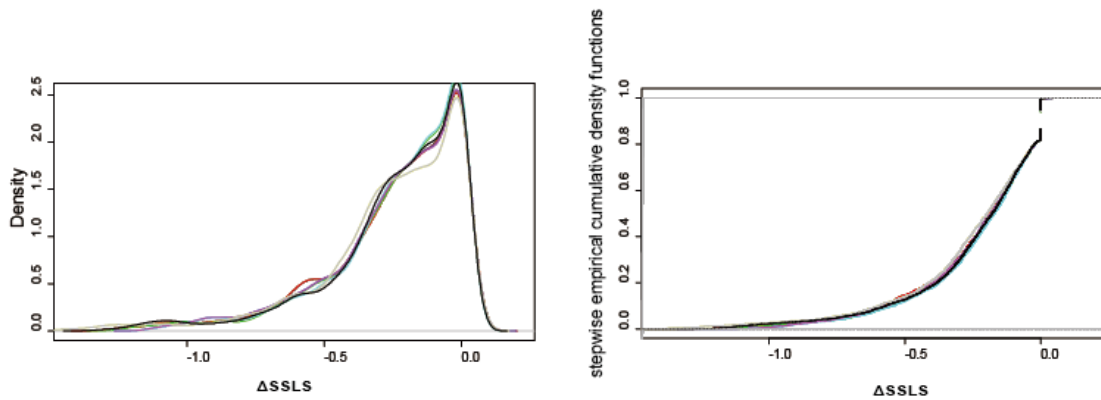

(9 trees with 50 replications for each 50 genes set )

**Supplementary Figure S9.** Plots of  $\Delta$ SSLS (left) and their stepwise empirical cumulative density functions (right) estimated from simulated data.



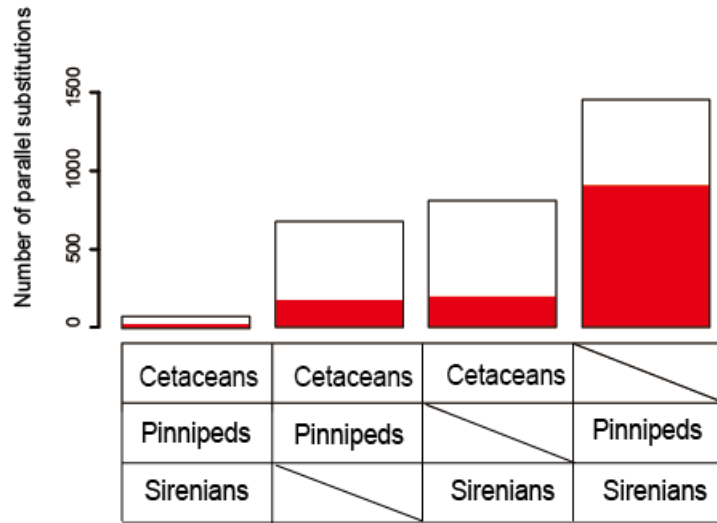

**Supplementary Figure S10.** Number of parallel substitutions in marine mammals identified in the alignment of orthologs from 20 mammals. Unique parallel substitutions are shaded in red.

## Supplementary Tables

**Supplementary Table S1.** List of 133 parallel substitutions in the three marine lineages identified in the UCSC 100-way alignment.

| RefGenes     | Symbol    | Position | Parallel substitution in marine mammals <sup>a</sup> |
|--------------|-----------|----------|------------------------------------------------------|
| NM_001271208 | NEB       | 3855     | V-->I                                                |
| NM_001080491 | USP6NL    | 510      | T-->I                                                |
| NM_001145728 | LMNTD1    | 377      | A-->T                                                |
| NM_001198806 | MSANTD3   | 113      | S-->N                                                |
| NM_018012    | KIF26B    | 261      | V-->I                                                |
| NM_003632    | CNTNAP1   | 1040     | I-->V                                                |
| NM_000371    | TTR       | 41       | R-->Q                                                |
| NM_194248    | OTOF      | 1984     | Y-->C                                                |
| NM_001278370 | MPP2      | 299      | S-->N                                                |
| NM_176895    | PPAP2A    | 241      | I-->V                                                |
| NM_182641    | BPTF      | 2125     | T-->A                                                |
| NM_203394    | E2F7      | 675      | V-->I                                                |
| NM_020877    | DNAH2     | 1650     | M-->V                                                |
| NM_001229    | CASP9     | 88       | L-->F                                                |
| NM_012401    | PLXNB2    | 878      | N-->S                                                |
| NM_144973    | DENND5B   | 668      | T-->A                                                |
| NM_013365    | GGA1      | 471      | S-->G                                                |
| NM_025251    | ARHGAP39  | 259      | P-->S                                                |
| NM_001112734 | ZSCAN30   | 112      | R-->Q                                                |
| NM_001146336 | TMEM114   | 1        | W-->X                                                |
| NM_001198834 | PDE4DIP   | 2105     | P-->L                                                |
| NM_021267    | CERS1     | 181      | V-->I                                                |
| NM_178543    | ENPP7     | 385      | V-->I                                                |
| NM_017617    | NOTCH1    | 697      | I-->V                                                |
| NM_177531    | PKHD1L1   | 2339     | R-->Q                                                |
| NM_001002294 | FMO3      | 391      | Q-->R                                                |
| NM_001031720 | GSTCD     | 171      | T-->A                                                |
| NM_001037163 | FAM220A   | 142      | R-->G                                                |
| NM_001102416 | KNG1      | 417      | Q-->R                                                |
| NM_021248    | CDH22     | 620      | A-->T                                                |
| NM_002606    | PDE9A     | 231      | N-->S                                                |
| NM_001085423 | MILR1     | 1        | W-->X                                                |
| NM_001198956 | DCAF6     | 492      | A-->V                                                |
| NM_033504    | TMEM54    | 181      | A-->T                                                |
| NM_002114    | HIVEP1    | 263      | T-->A                                                |
| NM_000393    | COL5A2    | 253      | A-->T                                                |
| NM_001282281 | PYCR1     | 301      | Q-->R                                                |
| NM_006424    | SLC34A2   | 479      | N-->S                                                |
| NM_001113491 | SEPT9     | 146      | A-->T                                                |
| NM_020884    | MYH7B     | 1881     | K-->Q                                                |
| NM_032374    | APOPT1    | 24       | L-->F                                                |
| NM_020869    | DCDC5     | 148      | H-->R                                                |
| NM_020825    | CRAMP1L   | 800      | A-->T                                                |
| NM_198098    | AQP1      | 190      | G-->S                                                |
| NM_001278563 | COL26A1   | 442      | W-->X                                                |
| NM_207468    | FAM177B   | 15       | G-->R                                                |
| NM_024644    | C14orf169 | 642      | W-->X                                                |
| NM_133475    | ANKRD24   | 655      | N-->S                                                |
| NM_001098525 | CKAP2     | 116      | I-->V                                                |
| NM_000694    | ALDH3B1   | 469      | W-->X                                                |

|              |                    |      |       |
|--------------|--------------------|------|-------|
| NM_001145512 | NFIA               | 508  | T-->A |
| NM_183008    | UBXN11             | 132  | M-->T |
| NM_001287390 | CCBL1              | 26   | T-->A |
| NM_015120    | ALMS1              | 310  | H-->R |
| NM_001077182 | FSCN2              | 207  | R-->H |
| NM_014002    | IKBKE              | 498  | R-->K |
| NM_006478    | GAS2L1             | 682  | W-->X |
| NM_172195    | EIF2B4             | 372  | E-->K |
| NM_001172818 | PGM1               | 49   | E-->A |
| NM_001278525 | ZNF518A            | 1484 | W-->X |
| NM_024032    | C17orf53           | 295  | R-->H |
| NM_001166663 | CD244              | 86   | T-->I |
| NM_002457    | MUC2               | 283  | G-->R |
| NM_002355    | M6PR               | 130  | N-->S |
| NM_032656    | DHX37              | 1024 | T-->A |
| NM_080744    | SSC4D              | 512  | R-->H |
| NM_001242409 | GAREM              | 756  | K-->E |
| NM_001385    | DPYS               | 498  | V-->I |
| NM_198534    | C19orf45           | 481  | H-->R |
| NM_001256041 | MYO1A              | 492  | R-->H |
| NM_001099626 | MTFR1L             | 7    | N-->S |
| NM_007300    | BRCA1              | 1628 | V-->A |
| NM_004727    | SLC24A1            | 763  | A-->T |
| NM_001199824 | SBK3               | 360  | W-->X |
| NM_024100    | WDR18              | 381  | A-->G |
| NM_001278211 | LRRC20             | 80   | R-->H |
| NM_001198934 | ABCC10             | 57   | D-->G |
| NM_031951    | WDR87              | 372  | Q-->R |
| NM_001802    | CDR2               | 365  | K-->R |
| NM_003613    | CILP               | 868  | R-->Q |
| NM_178173    | CCDC36             | 564  | N-->S |
| NM_175875    | SIX5               | 630  | T-->A |
| NM_138420    | AHNAK2             | 5721 | P-->L |
| NM_001110199 | SRRM3              | 654  | W-->X |
| NM_001198759 | LY75-CD302         | 1137 | H-->Q |
| NM_024552    | CERS4              | 191  | I-->V |
| NM_001200049 | CFAP46             | 2572 | R-->G |
| NM_000120    | EPHX1              | 390  | M-->I |
| NM_152354    | ZNF285             | 311  | S-->L |
| NM_018414    | ST6GALNAC1         | 133  | M-->V |
| NM_001001419 | SMAD5              | 466  | W-->X |
| NM_007289    | MME                | 117  | V-->I |
| NM_021185    | CATSPERG           | 560  | I-->V |
| NM_001172437 | PEG10              | 1    | W-->X |
| NM_015021    | ZNF292             | 869  | R-->G |
| NM_015909    | NBAS               | 1390 | A-->V |
| NM_138402    | SP140L             | 368  | M-->I |
| NM_001010879 | ZIK1               | 107  | P-->S |
| NM_002349    | LY75               | 1137 | H-->Q |
| NM_201266    | NRP2               | 671  | S-->G |
| NM_001286441 | EXD1               | 498  | S-->N |
| NM_002115    | HK3                | 816  | P-->S |
| NM_203437    | AFTPH              | 54   | R-->H |
| NM_005449    | FAIM3              | 33   | I-->V |
| NM_001198812 | MSANTD3-<br>TMEFF1 | 113  | S-->N |
| NM_152513    | MEI1               | 191  | N-->S |
| NM_032534    | KRBA1              | 246  | R-->G |
| NM_001163629 | MROH9              | 714  | N-->S |
| NM_006184    | NUCB1              | 14   | P-->S |
| NM_001105520 | C17orf100          | 119  | W-->X |
| NM_018441    | PECR               | 194  | V-->I |
| NM_000488    | SERPINC1           | 430  | N-->S |
| NM_001080426 | DUSP27             | 830  | N-->S |
| NM_002473    | MYH9               | 1650 | Y-->C |

|              |         |      |       |
|--------------|---------|------|-------|
| NM_001167740 | SMYD3   | 311  | A-->T |
| NM_000616    | CD4     | 448  | P-->S |
| NM_001145051 | TMEM247 | 220  | W-->X |
| NM_001009909 | LUZP2   | 102  | S-->T |
| NM_003638    | ITGA8   | 803  | H-->R |
| NM_001134363 | RBM20   | 745  | P-->L |
| NM_006005    | WFS1    | 109  | H-->R |
| NM_006005    | WFS1    | 606  | V-->I |
| NM_170601    | SIAE    | 468  | I-->V |
| NM_000183    | HADHB   | 128  | K-->R |
| NM_181352    | ATF7IP  | 936  | T-->A |
| NM_052859    | RFT1    | 502  | I-->V |
| NM_001100112 | MYH2    | 1792 | M-->L |
| NM_001281740 | FHOD3   | 695  | A-->V |
| NM_001195833 | RINL    | 328  | G-->E |
| NM_001270424 | DHRS12  | 171  | I-->V |
| NM_016224    | SNX9    | 132  | A-->T |
| NM_213596    | FOXN4   | 487  | A-->T |
| NM_021925    | C2orf43 | 36   | N-->S |

a, Parallel amino acid change in marine mammals (shown are Node of marine mammals and each terrestrial taxa --> marine mammals).

**Supplementary Table S2.** List of 26 genes with unique amino acid changes identified from the analysis of 65 mammalian genomes.

| Symbol         | RefGene      | Terrestrial mammals <sup>a</sup> | Marine mammals <sup>b</sup> | Position | Unique amino acid change <sup>c</sup> | Parallel amino acid change <sup>d</sup> |
|----------------|--------------|----------------------------------|-----------------------------|----------|---------------------------------------|-----------------------------------------|
| <i>CPT2</i>    | NM_000098    | 50/57                            | 8/8                         | 37       | R --> LLLLLLS                         |                                         |
| <i>TGM1</i>    | NM_000359    | 53/57                            | 8/8                         | 34       | R --> HHHHHGGH                        |                                         |
| <i>GPAA1</i>   | NM_003801    | 54/57                            | 8/8                         | 421      | G --> RRRRRTTD                        |                                         |
| <i>BST2</i>    | NM_004335    | 36/57                            | 5/8                         | 176      | S --> ---EEIIM                        |                                         |
| <i>INSL5</i>   | NM_005478    | 49/57                            | 7/8                         | 119      | T --> K-KKKRRV                        |                                         |
| <i>TBLIX</i>   | NM_005647    | 25/57                            | 5/8                         | 28       | F --> ---PPPPW                        |                                         |
| <i>ZC3H7B</i>  | NM_017590    | 52/57                            | 8/8                         | 224      | T --> PPPPPPS                         |                                         |
| <i>ZBTB21</i>  | NM_020727    | 51/57                            | 5/8                         | 376      | V --> ---SSGGG                        |                                         |
| <i>LMANIL</i>  | NM_021819    | 56/57                            | 8/8                         | 257      | P --> AAAAAALL                        |                                         |
| <i>WDR18</i>   | NM_024100    | 51/57                            | 8/8                         | 381      | A --> RGRGGGGG                        | AAA -->GGGGG                            |
| <i>ANKRD23</i> | NM_144994    | 53/57                            | 5/8                         | 265      | Y --> ---SSCWC                        |                                         |
| <i>SPATA2L</i> | NM_152339    | 48/57                            | 7/8                         | 401      | A --> -HHHHGGQ                        |                                         |
| <i>TMC8</i>    | NM_152468    | 44/57                            | 8/8                         | 68       | R --> HHHHHSSL                        |                                         |
| <i>KNDC1</i>   | NM_152643    | 48/57                            | 8/8                         | 872      | R --> HHHHHHHS                        |                                         |
| <i>KCNG4</i>   | NM_172347    | 56/57                            | 8/8                         | 163      | R --> QQQQGGGQ                        |                                         |
| <i>TAS2R38</i> | NM_176817    | 55/57                            | 5/8                         | 39       | V --> ---MMML                         |                                         |
| <i>SPNS3</i>   | NM_182538    | 48/57                            | 7/8                         | 27       | Q --> PP-PPPH                         |                                         |
| <i>ANXA2R</i>  | NM_001014279 | 23/57                            | 5/8                         | 159      | L --> ---EEVVC                        |                                         |
| <i>SBK2</i>    | NM_001101401 | 47/57                            | 8/8                         | 198      | R --> WWWWWWG                         |                                         |

|                 |              |       |     |      |                 |                |
|-----------------|--------------|-------|-----|------|-----------------|----------------|
| <i>NLRP7</i>    | NM_001127255 | 34/57 | 8/8 | 811  | K --> SSSSSMMM  |                |
| <i>CCDC168</i>  | NM_001146197 | 46/57 | 5/8 | 3821 | R --> ---TTEET  |                |
| <i>DCAF6</i>    | NM_001198956 | 47/57 | 8/8 | 492  | A --> VVVVVVVVV | AAA --> VVVVVV |
| <i>MYBPC1</i>   | NM_001254718 | 57/57 | 7/8 | 404  | G --> -EEEEED   |                |
| <i>NEIL1</i>    | NM_001256552 | 50/57 | 8/8 | 439  | T --> RRRCCRRR  |                |
| <i>C9orf173</i> | NM_001256699 | 34/57 | 5/8 | 317  | A --> ---SSSLQ  |                |
| <i>OBSCN</i>    | NM_001271223 | 54/57 | 8/8 | 6674 | S --> NCNNNDDA  |                |

---

a, The number of terrestrial mammals which have the amino acid residue in the analyzed position/ the total number of terrestrial mammals. The remaining terrestrial mammals have gap at that position.

b, The number of marine mammals which have the amino acid residue in the analyzed position/the total number of marine mammals. The remaining marine mammals have gap at that position.

c, Unique amino acid change in marine mammals (shown in this order: Human --> Minke whale, Yangtze River dolphin, Sperm whale, Dolphin, Killer whale, Walrus, Weddell seal, Manatee). Dash denotes gap in the position of corresponding species.

d, Parallel amino acid change in marine mammals (shown are Node of cetaceans and Ruminantia, node of pinnipeds and panda, node of sirenians, elephant and Cape elephant shrew --> Dolphin, Killer whale, Walrus, Weddell seal, Manatee).

**Supplementary Table S3.** List of 70 aquatic adaptation genes identified in the three marine mammalian lineages.  $\Delta$ SSLS with significant statistical support are shaded in gray.

| Symbol         | dN/dS (Backgr<br>ound) | dN/dS (Marine<br>mammals) | P (LRT) | $\Delta$ SSLS & P value (From convergence hypotheses HA to HI) |        |         |        |         |        |         |        |         |        |         |        |         |        |         |        |         |        |
|----------------|------------------------|---------------------------|---------|----------------------------------------------------------------|--------|---------|--------|---------|--------|---------|--------|---------|--------|---------|--------|---------|--------|---------|--------|---------|--------|
|                |                        |                           |         | HA                                                             | P(cdf) | HB      | P(cdf) | HC      | P(cdf) | HD      | P(cdf) | HE      | P(cdf) | HF      | P(cdf) | HG      | P(cdf) | HH      | P(cdf) | HI      | P(cdf) |
| <i>M6PR</i>    | 0.072                  | 0.283                     | 0.019   | 0.0027                                                         | 0.007  | 0.0027  | 0.007  | 0.0027  | 0.007  | -0.0449 | 0.239  | -0.0027 | 0.184  | -0.0449 | 0.238  | 0.0027  | 0.004  | 0.0027  | 0.005  | 0.0027  | 0.005  |
| <i>ERLEC1</i>  | 0.044                  | 0.175                     | 0.018   | 0.0266                                                         | 0.002  | 0.0266  | 0.002  | 0.0266  | 0.002  | 0.0266  | 0.002  | 0.0266  | 0.002  | 0.0266  | 0.002  | 0.0070  | 0.002  | 0.0198  | 0.001  | 0.0070  | 0.003  |
| <i>RHOV</i>    | 0.018                  | 0.137                     | 0.028   | 0.0000                                                         | 0.155  | 0.0000  | 0.155  | 0.0000  | 0.159  | 0.0000  | 0.136  | 0.0000  | 0.148  | 0.0000  | 0.141  | 0.0000  | 0.010  | 0.0000  | 0.012  | 0.0000  | 0.044  |
| <i>CKM</i>     | 0.033                  | 0.094                     | 0.007   | -0.0198                                                        | 0.196  | -0.0180 | 0.196  | -0.0233 | 0.202  | 0.0167  | 0.003  | 0.0222  | 0.003  | 0.0195  | 0.003  | 0.0496  | 0.000  | 0.0550  | 0.000  | 0.0465  | 0.000  |
| <i>CTSC</i>    | 0.189                  | 0.547                     | 0.001   | -0.3632                                                        | 0.762  | -0.3632 | 0.762  | 0.5162  | 0.000  | 0.4870  | 0.000  | -0.0906 | 0.337  | -0.0906 | 0.326  | -0.3242 | 0.703  | 0.4395  | 0.000  | -0.3242 | 0.736  |
| <i>RPL22</i>   | 0.010                  | 0.077                     | 0.017   | 0.0000                                                         | 0.160  | 0.0000  | 0.160  | 0.0000  | 0.160  | 0.0000  | 0.048  | 0.0000  | 0.043  | 0.0000  | 0.044  | 0.0000  | 0.149  | 0.0000  | 0.151  | 0.0000  | 0.152  |
| <i>ATG14</i>   | 0.062                  | 0.234                     | 0.015   | 0.0134                                                         | 0.005  | 0.0134  | 0.005  | 0.0214  | 0.003  | -0.0195 | 0.198  | -0.0275 | 0.214  | -0.0275 | 0.213  | 0.0381  | 0.001  | 0.0381  | 0.001  | 0.0381  | 0.001  |
| <i>CKMT2</i>   | 0.023                  | 0.112                     | 0.000   | 0.0000                                                         | 0.010  | -0.0123 | 0.010  | -0.0043 | 0.186  | -0.0043 | 0.185  | -0.0123 | 0.191  | 0.0000  | 0.009  | -0.0178 | 0.194  | -0.0098 | 0.188  | -0.0055 | 0.185  |
| <i>PHC2</i>    | 0.060                  | 0.174                     | 0.001   | -0.0027                                                        | 0.184  | 0.0016  | 0.184  | -0.0114 | 0.190  | -0.0079 | 0.188  | 0.0050  | 0.005  | 0.0008  | 0.008  | 0.0160  | 0.001  | 0.0031  | 0.005  | 0.0117  | 0.002  |
| <i>DDX25</i>   | 0.043                  | 0.123                     | 0.020   | 0.0001                                                         | 0.010  | 0.0001  | 0.010  | 0.0001  | 0.011  | -0.0027 | 0.183  | -0.0027 | 0.183  | -0.0027 | 0.183  | 0.0184  | 0.001  | 0.0184  | 0.001  | 0.0184  | 0.002  |
| <i>AGPAT9</i>  | 0.078                  | 0.314                     | 0.000   | -0.0008                                                        | 0.181  | -0.0008 | 0.181  | -0.0008 | 0.181  | -0.0127 | 0.191  | -0.0127 | 0.191  | -0.0127 | 0.190  | 0.0062  | 0.002  | 0.0062  | 0.003  | 0.0062  | 0.003  |
| <i>GRIA2</i>   | 0.054                  | 0.184                     | 0.000   | -0.1744                                                        | 0.485  | -0.1744 | 0.485  | 0.0150  | 0.004  | 0.0150  | 0.004  | 0.0097  | 0.005  | 0.0097  | 0.005  | -0.1610 | 0.436  | 0.0150  | 0.002  | -0.1610 | 0.471  |
| <i>MAP3K13</i> | 0.045                  | 0.177                     | 0.000   | 0.0000                                                         | 0.144  | 0.0000  | 0.144  | 0.0000  | 0.144  | 0.0000  | 0.022  | 0.0000  | 0.028  | 0.0000  | 0.026  | 0.0000  | 0.023  | 0.0000  | 0.019  | 0.0000  | 0.028  |
| <i>SAE1</i>    | 0.089                  | 0.328                     | 0.000   | -0.1189                                                        | 0.380  | -0.1189 | 0.380  | 0.1705  | 0.000  | 0.1423  | 0.000  | -0.1370 | 0.439  | -0.1370 | 0.415  | -0.1493 | 0.417  | 0.1205  | 0.000  | -0.1449 | 0.438  |
| <i>KLHL8</i>   | 0.032                  | 0.137                     | 0.001   | 0.0029                                                         | 0.007  | 0.0029  | 0.007  | 0.0029  | 0.007  | -0.0131 | 0.191  | -0.0131 | 0.191  | -0.0131 | 0.190  | 0.0029  | 0.004  | 0.0029  | 0.005  | 0.0029  | 0.005  |
| <i>LIN7C</i>   | 0.002                  | 0.031                     | 0.014   | 0.0000                                                         | 0.042  | 0.0000  | 0.042  | 0.0000  | 0.044  | 0.0000  | 0.041  | 0.0000  | 0.035  | 0.0000  | 0.044  | 0.0000  | 0.168  | 0.0000  | 0.169  | 0.0000  | 0.031  |

|                |       |       |       |         |       |         |       |         |       |         |       |         |       |         |       |         |       |         |       |         |       |
|----------------|-------|-------|-------|---------|-------|---------|-------|---------|-------|---------|-------|---------|-------|---------|-------|---------|-------|---------|-------|---------|-------|
| <i>THRB</i>    | 0.235 | 0.488 | 0.000 | 0.4158  | 0.000 | 0.4151  | 0.000 | 0.4175  | 0.000 | 0.4685  | 0.000 | 0.4685  | 0.000 | 0.4691  | 0.000 | -0.1240 | 0.373 | 0.3671  | 0.000 | -0.1240 | 0.394 |
| <i>PDLIM3</i>  | 0.138 | 0.373 | 0.000 | 0.0245  | 0.002 | 0.0205  | 0.002 | 0.0314  | 0.002 | -0.0521 | 0.254 | -0.4949 | 0.877 | -0.3951 | 0.800 | -0.0685 | 0.277 | -0.1093 | 0.346 | -0.0187 | 0.196 |
| <i>AIFM1</i>   | 0.066 | 0.345 | 0.000 | -0.0263 | 0.206 | -0.0263 | 0.206 | 0.4507  | 0.000 | 0.4507  | 0.000 | -0.0263 | 0.212 | -0.0377 | 0.226 | -0.0338 | 0.217 | 0.4269  | 0.000 | -0.0267 | 0.208 |
| <i>CCNYL1</i>  | 0.072 | 0.265 | 0.014 | -0.0016 | 0.182 | -0.0016 | 0.182 | 0.2545  | 0.000 | 0.2545  | 0.000 | -0.0016 | 0.181 | -0.0190 | 0.198 | -0.0016 | 0.181 | 0.2545  | 0.000 | -0.0060 | 0.185 |
| <i>CCNL1</i>   | 0.014 | 0.394 | 0.000 | 0.0000  | 0.043 | 0.0000  | 0.043 | 0.0000  | 0.043 | 0.0000  | 0.040 | 0.0000  | 0.038 | 0.0000  | 0.044 | 0.0000  | 0.032 | 0.0000  | 0.034 | 0.0000  | 0.037 |
| <i>LRFN5</i>   | 0.014 | 0.081 | 0.006 | 0.0000  | 0.044 | 0.0000  | 0.044 | 0.0000  | 0.033 | 0.0000  | 0.037 | 0.0000  | 0.026 | 0.0000  | 0.033 | 0.0000  | 0.024 | 0.0000  | 0.032 | 0.0000  | 0.022 |
| <i>SEC23A</i>  | 0.013 | 0.090 | 0.000 | 0.0000  | 0.034 | 0.0000  | 0.034 | 0.0000  | 0.024 | 0.0000  | 0.019 | 0.0000  | 0.019 | 0.0000  | 0.039 | 0.0000  | 0.010 | 0.0000  | 0.009 | 0.0000  | 0.020 |
| <i>HNRNPD</i>  | 0.000 | 0.109 | 0.001 | -0.0013 | 0.182 | -0.0013 | 0.182 | 0.0174  | 0.003 | 0.0174  | 0.003 | -0.0013 | 0.181 | -0.0013 | 0.181 | -0.0013 | 0.181 | 0.0095  | 0.002 | -0.0013 | 0.182 |
| <i>FGF13</i>   | 0.052 | 0.381 | 0.000 | 0.2253  | 0.000 | 0.2253  | 0.000 | 0.2281  | 0.000 | 0.2281  | 0.000 | 0.2253  | 0.000 | 0.2253  | 0.000 | 0.2253  | 0.000 | 0.2281  | 0.000 | 0.2253  | 0.000 |
| <i>PABPC1</i>  | 0.018 | 0.097 | 0.000 | 0.0000  | 0.053 | 0.0000  | 0.053 | 0.0000  | 0.052 | 0.0000  | 0.051 | 0.0000  | 0.050 | 0.0000  | 0.052 | 0.0000  | 0.037 | 0.0000  | 0.042 | 0.0000  | 0.038 |
| <i>GLS</i>     | 0.063 | 0.401 | 0.000 | 0.3326  | 0.000 | 0.0000  | 0.000 | 0.0000  | 0.146 | 0.3637  | 0.000 | 0.3637  | 0.000 | 0.3637  | 0.000 | 0.3637  | 0.000 | 0.3637  | 0.000 | 0.3637  | 0.000 |
| <i>DSCAML1</i> | 0.030 | 0.943 | 0.013 | 0.0003  | 0.010 | 0.0003  | 0.010 | 0.0003  | 0.011 | 0.0003  | 0.008 | 0.0003  | 0.008 | 0.0003  | 0.008 | 0.0000  | 0.138 | 0.0000  | 0.140 | 0.0000  | 0.136 |
| <i>ANXA2</i>   | 0.035 | 0.110 | 0.002 | 0.0115  | 0.005 | 0.0202  | 0.005 | 0.0115  | 0.004 | -0.0123 | 0.191 | -0.0037 | 0.185 | -0.0123 | 0.189 | 0.0199  | 0.001 | 0.0128  | 0.002 | 0.0128  | 0.002 |
| <i>ASB7</i>    | 0.011 | 0.041 | 0.047 | 0.0000  | 0.040 | 0.0000  | 0.040 | 0.0000  | 0.038 | 0.0000  | 0.033 | 0.0000  | 0.033 | 0.0000  | 0.036 | 0.0000  | 0.027 | 0.0000  | 0.028 | 0.0000  | 0.028 |
| <i>SF3B1</i>   | 0.004 | 0.065 | 0.027 | 0.0650  | 0.000 | 0.0650  | 0.000 | 2.4342  | 0.000 | 2.4342  | 0.000 | 0.0650  | 0.000 | 0.0650  | 0.000 | 0.0650  | 0.000 | 2.4342  | 0.000 | 0.0650  | 0.000 |
| <i>BCL11A</i>  | 0.166 | 0.405 | 0.002 | 0.3843  | 0.000 | 0.3843  | 0.000 | 0.3843  | 0.000 | 0.3484  | 0.000 | 0.0375  | 0.002 | 0.0375  | 0.002 | 0.0375  | 0.001 | 0.3484  | 0.000 | 0.0375  | 0.001 |
| <i>SPTY2D1</i> | 0.315 | 1.862 | 0.020 | 0.2124  | 0.000 | 0.2124  | 0.000 | 0.2124  | 0.000 | 0.2124  | 0.000 | 0.2124  | 0.000 | 0.2124  | 0.000 | 0.2124  | 0.000 | 0.2124  | 0.000 | 0.2124  | 0.000 |
| <i>SH2D4B</i>  | 0.114 | 0.295 | 0.000 | -0.2007 | 0.525 | -0.2007 | 0.525 | 0.0696  | 0.000 | 0.0767  | 0.000 | -0.1532 | 0.472 | -0.1532 | 0.449 | -0.1547 | 0.425 | 0.0681  | 0.000 | -0.1547 | 0.457 |
| <i>RNF13</i>   | 0.053 | 0.132 | 0.018 | -0.0261 | 0.206 | -0.0257 | 0.206 | -0.0307 | 0.213 | -0.0283 | 0.213 | -0.0098 | 0.189 | -0.0226 | 0.205 | 0.0053  | 0.002 | 0.0002  | 0.006 | 0.0002  | 0.006 |
| <i>MYL1</i>    | 0.035 | 0.127 | 0.044 | -0.0993 | 0.336 | -0.0480 | 0.336 | -0.0993 | 0.349 | -0.0529 | 0.254 | 0.0183  | 0.004 | -0.0529 | 0.254 | -0.0061 | 0.185 | -0.0373 | 0.224 | -0.0373 | 0.226 |
| <i>ST5</i>     | 0.012 | 0.081 | 0.002 | -0.0039 | 0.185 | -0.0039 | 0.185 | -0.0039 | 0.186 | -0.0018 | 0.182 | 0.0084  | 0.005 | -0.0018 | 0.182 | -0.0077 | 0.187 | -0.0121 | 0.189 | -0.0121 | 0.188 |
| <i>MAPK10</i>  | 0.015 | 0.076 | 0.000 | 0.0000  | 0.053 | 0.0000  | 0.053 | 0.0000  | 0.024 | 0.0000  | 0.051 | 0.0000  | 0.028 | 0.0000  | 0.139 | 0.0000  | 0.139 | 0.0000  | 0.034 | 0.0000  | 0.136 |
| <i>ESRRG</i>   | 0.007 | 0.054 | 0.000 | 0.0000  | 0.028 | 0.0000  | 0.028 | 0.0000  | 0.027 | 0.0000  | 0.033 | 0.0000  | 0.035 | 0.0000  | 0.033 | 0.0000  | 0.044 | 0.0000  | 0.044 | 0.0000  | 0.034 |



|                |       |       |       |         |       |         |       |         |       |         |       |         |       |         |       |         |       |         |       |         |       |
|----------------|-------|-------|-------|---------|-------|---------|-------|---------|-------|---------|-------|---------|-------|---------|-------|---------|-------|---------|-------|---------|-------|
| <i>EPHA7</i>   | 0.037 | 0.071 | 0.016 | -0.0222 | 0.199 | -0.0222 | 0.199 | 0.0118  | 0.004 | 0.0127  | 0.004 | -0.0164 | 0.195 | -0.0164 | 0.194 | -0.0160 | 0.191 | 0.0127  | 0.002 | -0.0164 | 0.192 |
| <i>EPS15</i>   | 0.098 | 0.721 | 0.000 | 0.0311  | 0.002 | 0.0311  | 0.002 | 0.9332  | 0.000 | 0.9332  | 0.000 | 0.0311  | 0.002 | 0.0311  | 0.002 | 0.0311  | 0.001 | 0.9332  | 0.000 | 0.0311  | 0.001 |
| <i>GLRA4</i>   | 0.055 | 0.134 | 0.014 | -0.0105 | 0.190 | -0.0105 | 0.190 | -0.0105 | 0.190 | 0.0040  | 0.005 | 0.0040  | 0.005 | 0.0040  | 0.005 | 0.0040  | 0.003 | 0.0040  | 0.004 | 0.0040  | 0.004 |
| <i>RBBP4</i>   | 0.024 | 0.093 | 0.005 | 0.0000  | 0.016 | 0.0000  | 0.016 | 0.0000  | 0.060 | 0.0000  | 0.054 | 0.0000  | 0.054 | 0.0000  | 0.013 | 0.0000  | 0.054 | 0.0000  | 0.054 | 0.0000  | 0.009 |
| <i>PARK7</i>   | 0.122 | 0.344 | 0.007 | 0.0103  | 0.005 | 0.0178  | 0.005 | 0.0103  | 0.004 | 0.0103  | 0.004 | 0.0178  | 0.004 | 0.0103  | 0.004 | 0.0159  | 0.002 | 0.0159  | 0.002 | 0.0159  | 0.002 |
| <i>PLCB4</i>   | 0.032 | 0.092 | 0.000 | -0.1495 | 0.444 | -0.1495 | 0.444 | -0.0704 | 0.290 | -0.0728 | 0.288 | -0.1262 | 0.413 | -0.1263 | 0.392 | 0.0100  | 0.002 | 0.0100  | 0.002 | 0.0170  | 0.002 |
| <i>GALT</i>    | 0.073 | 0.326 | 0.000 | -0.0352 | 0.220 | -0.0352 | 0.220 | 0.2048  | 0.000 | 0.2048  | 0.000 | -0.0352 | 0.224 | -0.0352 | 0.222 | -0.0352 | 0.220 | 0.2048  | 0.000 | -0.0352 | 0.221 |
| <i>NPSR1</i>   | 0.057 | 0.778 | 0.000 | 0.0047  | 0.006 | 0.0047  | 0.006 | 0.0047  | 0.006 | -0.0352 | 0.222 | -0.0352 | 0.224 | -0.0352 | 0.222 | 0.0047  | 0.002 | 0.0047  | 0.003 | 0.0047  | 0.003 |
| <i>MB21D2</i>  | 0.004 | 0.019 | 0.013 | 0.0000  | 0.042 | 0.0000  | 0.042 | 0.0000  | 0.040 | 0.0000  | 0.036 | 0.0000  | 0.035 | 0.0000  | 0.043 | 0.0000  | 0.031 | 0.0000  | 0.032 | 0.0000  | 0.029 |
| <i>MEIS1</i>   | 0.125 | 1.485 | 0.000 | 0.0000  | 0.060 | 0.0000  | 0.060 | 0.0000  | 0.012 | 0.0000  | 0.010 | 0.0000  | 0.054 | 0.0000  | 0.054 | 0.0000  | 0.054 | 0.0000  | 0.008 | 0.0000  | 0.052 |
| <i>ZSWIM8</i>  | 0.112 | 0.539 | 0.000 | -0.0357 | 0.221 | -0.0357 | 0.221 | 0.4954  | 0.000 | 0.4954  | 0.000 | -0.0357 | 0.225 | -0.0357 | 0.223 | -0.0357 | 0.222 | 0.4954  | 0.000 | -0.0357 | 0.223 |
| <i>ROCK1</i>   | 0.017 | 0.193 | 0.006 | 0.0000  | 0.144 | 0.0000  | 0.144 | 0.0000  | 0.060 | 0.0000  | 0.034 | 0.0000  | 0.033 | 0.0000  | 0.139 | 0.0000  | 0.037 | 0.0000  | 0.037 | 0.0000  | 0.029 |
| <i>SZRD1</i>   | 0.224 | 0.881 | 0.027 | 0.0000  | 0.148 | 0.0000  | 0.148 | 0.0000  | 0.149 | 0.0000  | 0.044 | 0.0000  | 0.035 | 0.0000  | 0.044 | 0.0000  | 0.018 | 0.0000  | 0.141 | 0.0000  | 0.012 |
| <i>AGR2</i>    | 0.118 | 0.293 | 0.005 | -0.0716 | 0.286 | -0.0716 | 0.286 | -0.0716 | 0.292 | 0.0258  | 0.002 | 0.0258  | 0.002 | 0.0258  | 0.002 | -0.0119 | 0.189 | -0.0119 | 0.189 | -0.0119 | 0.188 |
| <i>FAM49B</i>  | 0.012 | 0.115 | 0.000 | -0.0123 | 0.190 | -0.0123 | 0.190 | 0.0791  | 0.000 | 0.0791  | 0.000 | -0.0123 | 0.191 | -0.0123 | 0.189 | -0.0123 | 0.189 | 0.0791  | 0.000 | -0.0123 | 0.188 |
| <i>PRKCA</i>   | 0.017 | 0.059 | 0.006 | 0.0064  | 0.005 | 0.0064  | 0.005 | 0.0064  | 0.005 | 0.0064  | 0.005 | 0.0064  | 0.005 | 0.0064  | 0.005 | -0.0316 | 0.212 | -0.0316 | 0.212 | -0.0263 | 0.207 |
| <i>LDB3</i>    | 0.193 | 0.271 | 0.000 | 0.6157  | 0.000 | 0.6157  | 0.000 | 1.1291  | 0.000 | 1.2349  | 0.000 | 0.6312  | 0.000 | 0.6312  | 0.000 | 0.6526  | 0.000 | 1.0426  | 0.000 | 0.6933  | 0.000 |
| <i>YBX1</i>    | 0.022 | 0.556 | 0.000 | 0.0000  | 0.155 | 0.0000  | 0.155 | 0.0000  | 0.156 | 0.0000  | 0.050 | 0.0000  | 0.034 | 0.0000  | 0.050 | 0.0000  | 0.034 | 0.0000  | 0.035 | 0.0000  | 0.034 |
| <i>HERPUD1</i> | 0.093 | 0.653 | 0.000 | -0.0863 | 0.313 | -0.0863 | 0.313 | 0.3326  | 0.000 | 0.2624  | 0.000 | -0.1378 | 0.441 | -0.1562 | 0.454 | -0.0863 | 0.306 | 0.3326  | 0.000 | -0.0863 | 0.314 |
| <i>STK36</i>   | 0.019 | 0.148 | 0.003 | 0.0000  | 0.055 | 0.0000  | 0.055 | 0.0000  | 0.057 | 0.0000  | 0.054 | 0.0000  | 0.050 | 0.0000  | 0.054 | 0.0000  | 0.041 | 0.0000  | 0.144 | 0.0000  | 0.050 |
| <i>TSC22D1</i> | 0.154 | 1.202 | 0.007 | 0.2561  | 0.000 | 0.2561  | 0.000 | 2.2508  | 0.000 | 2.4279  | 0.000 | 0.2550  | 0.000 | 0.2550  | 0.000 | 0.2549  | 0.000 | 2.1917  | 0.000 | 0.2549  | 0.000 |
| <i>PIGP</i>    | 0.094 | 0.655 | 0.001 | 0.0030  | 0.007 | 0.0433  | 0.007 | 0.0030  | 0.007 | 0.0030  | 0.006 | 0.0433  | 0.002 | 0.0030  | 0.006 | -0.0082 | 0.187 | -0.0485 | 0.244 | -0.0485 | 0.248 |
| <i>ADPRH</i>   | 0.080 | 0.572 | 0.000 | -0.0165 | 0.193 | -0.0169 | 0.193 | 0.0003  | 0.011 | -0.0554 | 0.259 | -0.0411 | 0.236 | -0.0708 | 0.286 | -0.0563 | 0.254 | -0.0750 | 0.288 | -0.0880 | 0.317 |

|               |       |       |       |         |       |         |       |         |       |         |       |        |       |         |       |         |       |         |       |         |       |
|---------------|-------|-------|-------|---------|-------|---------|-------|---------|-------|---------|-------|--------|-------|---------|-------|---------|-------|---------|-------|---------|-------|
| <i>GRIA1</i>  | 0.020 | 0.092 | 0.030 | 0.0000  | 0.042 | 0.0000  | 0.042 | 0.0000  | 0.054 | 0.0000  | 0.048 | 0.0000 | 0.048 | 0.0000  | 0.036 | 0.0000  | 0.051 | 0.0000  | 0.050 | 0.0000  | 0.026 |
| <i>NRG1</i>   | 0.149 | 0.369 | 0.000 | 0.1174  | 0.000 | 0.1174  | 0.000 | 0.5072  | 0.000 | 0.7041  | 0.000 | 0.2349 | 0.000 | 0.2349  | 0.000 | 0.1274  | 0.000 | 0.5064  | 0.000 | 0.1335  | 0.000 |
| <i>KCNS1</i>  | 0.022 | 0.229 | 0.000 | -0.0673 | 0.276 | -0.0452 | 0.276 | -0.0597 | 0.269 | -0.0059 | 0.186 | 0.0087 | 0.005 | -0.0059 | 0.185 | -0.0319 | 0.212 | -0.0465 | 0.239 | -0.0446 | 0.239 |
| <i>NOVA1</i>  | 0.010 | 0.202 | 0.000 | 0.0000  | 0.056 | 0.0000  | 0.056 | 0.0000  | 0.057 | 0.0000  | 0.053 | 0.0000 | 0.052 | 0.0000  | 0.053 | 0.0000  | 0.041 | 0.0000  | 0.042 | 0.0000  | 0.042 |
| <i>CACNB4</i> | 0.032 | 0.079 | 0.026 | 0.0000  | 0.041 | 0.0000  | 0.041 | 0.0000  | 0.033 | 0.0000  | 0.024 | 0.0000 | 0.028 | 0.0000  | 0.033 | 0.0000  | 0.034 | 0.0000  | 0.037 | 0.0000  | 0.034 |
| <i>PPFIA2</i> | 0.053 | 0.435 | 0.002 | 0.0000  | 0.155 | 0.0000  | 0.155 | 0.0000  | 0.148 | 0.0000  | 0.156 | 0.0000 | 0.048 | 0.0000  | 0.151 | 0.0000  | 0.041 | 0.0000  | 0.019 | 0.0000  | 0.137 |
| <i>STXBP6</i> | 0.060 | 0.183 | 0.007 | 0.0000  | 0.057 | 0.0000  | 0.057 | 0.0000  | 0.054 | 0.0000  | 0.034 | 0.0000 | 0.029 | 0.0000  | 0.051 | 0.0000  | 0.023 | 0.0000  | 0.052 | 0.0000  | 0.166 |
| <i>NOP16</i>  | 0.052 | 0.231 | 0.014 | -0.0182 | 0.194 | 0.0171  | 0.194 | -0.0182 | 0.194 | -0.0182 | 0.197 | 0.0171 | 0.004 | -0.0182 | 0.197 | 0.0171  | 0.001 | -0.0182 | 0.195 | -0.0182 | 0.195 |

Notes:

dN/dS denotes the rate of protein evolution of marine and terrestrial mammals.

P (LRT), P value is based on LRT test.

$\Delta$ SSLs, Mean sitewise  $\Delta$ SSLs for each gene; positive values imply support for an alternative hypothesis.

P (cdf), P is the significance of an observed site  $\Delta$ SSLs comparison of the species topology and alternative hypothesis.

**Supplementary Table S4.** List of 70 aquatic adaptation genes with the number of unique amino acid changes in all three lineages of marine mammals (III), in any two of the three marine lineages (II) and in single lineages of marine mammals (I).

| Symbol         | I  | II | III |
|----------------|----|----|-----|
| <i>M6PR</i>    | 3  |    | 1   |
| <i>ERLEC1</i>  | 3  |    |     |
| <i>RHOV</i>    | 3  |    |     |
| <i>CKM</i>     | 7  |    |     |
| <i>CTSC</i>    | 12 | 13 |     |
| <i>RPL22</i>   | 2  |    |     |
| <i>ATG14</i>   | 7  |    |     |
| <i>CKMT2</i>   | 10 | 2  |     |
| <i>PHC2</i>    | 13 | 1  |     |
| <i>DDX25</i>   | 7  |    |     |
| <i>AGPAT9</i>  | 58 | 1  |     |
| <i>GRIA2</i>   | 63 | 1  |     |
| <i>MAP3K13</i> | 52 |    |     |
| <i>SAE1</i>    | 13 | 17 |     |
| <i>KLHL8</i>   | 16 |    |     |
| <i>LIN7C</i>   | 1  |    |     |
| <i>THRB</i>    | 6  |    |     |
|                | 19 |    |     |

|                |    |     |   |
|----------------|----|-----|---|
| <i>PDLIM3</i>  | 12 | 2   |   |
| <i>AIFM1</i>   | 53 | 23  | 1 |
| <i>CCNYL1</i>  | 56 | 9   |   |
| <i>CCNL1</i>   | 5  |     |   |
| <i>LRFN5</i>   | 4  |     |   |
| <i>SEC23A</i>  | 37 |     |   |
| <i>HNRNPD</i>  |    | 1   |   |
| <i>FGF13</i>   | 3  |     |   |
| <i>PABPC1</i>  | 10 |     |   |
| <i>GLS</i>     | 1  |     |   |
| <i>DSCAML1</i> | 3  |     |   |
| <i>ANXA2</i>   | 9  |     |   |
| <i>ASB7</i>    | 4  |     |   |
| <i>SF3B1</i>   | 6  | 102 | 4 |
| <i>BCL11A</i>  | 6  |     |   |
| <i>SPTY2D1</i> | 3  |     | 1 |
| <i>SH2D4B</i>  | 14 | 3   |   |
| <i>RNF13</i>   | 20 |     |   |
| <i>MYL1</i>    |    | 1   |   |
| <i>ST5</i>     | 56 |     |   |

|               |    |    |
|---------------|----|----|
| <i>MAPK10</i> | 1  |    |
| <i>ESRRG</i>  | 4  |    |
| <i>EPHA7</i>  | 8  | 2  |
| <i>EPS15</i>  | 1  | 15 |
| <i>GLRA4</i>  | 21 | 1  |
| <i>RBBP4</i>  | 77 | 2  |
| <i>PARK7</i>  | 5  |    |
| <i>PLCB4</i>  | 43 | 1  |
| <i>GALT</i>   | 4  | 5  |
| <i>NPSR1</i>  | 51 | 5  |
| <i>MB21D2</i> | 4  |    |
| <i>MEIS1</i>  | 15 | 1  |
| <i>ZSWIM8</i> | 5  | 3  |
| <i>ROCK1</i>  | 2  |    |
| <i>SZRD1</i>  | 7  |    |
| <i>AGR2</i>   | 6  |    |
| <i>FAM49B</i> | 1  | 8  |
| <i>PRKCA</i>  | 10 |    |
| <i>LDB3</i>   | 14 |    |
| <i>YBX1</i>   | 52 |    |

|                |    |    |   |
|----------------|----|----|---|
| <i>HERPUD1</i> | 14 | 16 |   |
| <i>STK36</i>   | 1  |    |   |
| <i>TSC22D1</i> |    | 1  |   |
| <i>PIGP</i>    | 29 | 3  |   |
| <i>ADPRH</i>   | 17 | 1  |   |
| <i>GRIA1</i>   | 18 |    |   |
| <i>NRG1</i>    | 9  | 32 | 1 |
| <i>KCNS1</i>   | 85 | 2  |   |
| <i>NOVA1</i>   | 38 |    |   |
| <i>CACNB4</i>  | 43 |    |   |
| <i>PPFIA2</i>  | 4  |    |   |
| <i>STXBP6</i>  | 7  |    |   |
| <i>NOP16</i>   | 3  | 1  |   |

---

**Supplementary Table S5.** Biological Process (BP) GO term enrichment result of 70 aquatic adaptation genes. Over-represented GO terms were defined as having Fisher exact test  $P \leq 0.05$ .

| GO ID      | Description                                                                          | Count | %    | P Value | Fold Enrichment | Fisher Exact Test P |
|------------|--------------------------------------------------------------------------------------|-------|------|---------|-----------------|---------------------|
| GO:0007268 | synaptic transmission                                                                | 7     | 10.6 | 0.001   | 5.8             | 1.90E-04            |
| GO:0048255 | mRNA stabilization                                                                   | 3     | 4.5  | 0.002   | 49.2            | 2.80E-05            |
| GO:0043489 | RNA stabilization                                                                    | 3     | 4.5  | 0.002   | 49.2            | 2.80E-05            |
| GO:0019226 | transmission of nerve impulse                                                        | 7     | 10.6 | 0.003   | 4.9             | 5.10E-04            |
| GO:0043488 | regulation of mRNA stability                                                         | 3     | 4.5  | 0.003   | 33.5            | 9.30E-05            |
| GO:0043487 | regulation of RNA stability                                                          | 3     | 4.5  | 0.004   | 30.7            | 1.20E-04            |
| GO:0007267 | cell-cell signaling                                                                  | 8     | 12.1 | 0.009   | 3.3             | 2.80E-03            |
| GO:0010608 | posttranscriptional regulation of gene expression                                    | 5     | 7.6  | 0.010   | 5.8             | 1.60E-03            |
| GO:0004111 | creatine kinase activity                                                             | 2     | 3.0  | 0.016   | 124.8           | 9.40E-05            |
| GO:0006898 | receptor-mediated endocytosis                                                        | 3     | 4.5  | 0.019   | 13.9            | 1.30E-03            |
| GO:0000377 | RNA splicing, via transesterification reactions with bulged adenosine as nucleophile | 4     | 6.1  | 0.023   | 6.4             | 3.40E-03            |
| GO:0000375 | RNA splicing, via transesterification reactions                                      | 4     | 6.1  | 0.023   | 6.4             | 3.40E-03            |
| GO:0000398 | nuclear mRNA splicing, via spliceosome                                               | 4     | 6.1  | 0.023   | 6.4             | 3.40E-03            |
| GO:0008380 | RNA splicing                                                                         | 5     | 7.6  | 0.026   | 4.3             | 5.80E-03            |
| GO:0003729 | mRNA binding                                                                         | 3     | 4.5  | 0.028   | 11.3            | 2.30E-03            |
| GO:0005230 | extracellular ligand-gated ion channel activity                                      | 3     | 4.5  | 0.032   | 10.4            | 3.00E-03            |

|            |                                                            |    |      |       |      |          |
|------------|------------------------------------------------------------|----|------|-------|------|----------|
| GO:0022836 | gated channel activity                                     | 5  | 7.6  | 0.033 | 4.0  | 7.80E-03 |
| GO:0006600 | creatine metabolic process                                 | 2  | 3.0  | 0.035 | 54.7 | 5.70E-04 |
| GO:0006599 | phosphagen metabolic process                               | 2  | 3.0  | 0.035 | 54.7 | 5.70E-04 |
| GO:0000165 | MAPKKK cascade                                             | 4  | 6.1  | 0.037 | 5.3  | 6.60E-03 |
| GO:0006397 | mRNA processing                                            | 5  | 7.6  | 0.039 | 3.8  | 9.60E-03 |
| GO:0031623 | receptor internalization                                   | 2  | 3.0  | 0.043 | 44.7 | 8.70E-04 |
| GO:0007242 | intracellular signaling cascade                            | 10 | 15.2 | 0.059 | 2.0  | 2.80E-02 |
| GO:0016071 | mRNA metabolic process                                     | 5  | 7.6  | 0.060 | 3.3  | 1.70E-02 |
| GO:0005216 | ion channel activity                                       | 5  | 7.6  | 0.064 | 3.2  | 1.90E-02 |
| GO:0016775 | phosphotransferase activity, nitrogenous group as acceptor | 2  | 3.0  | 0.065 | 29.4 | 2.10E-03 |
| GO:0030295 | protein kinase activator activity                          | 2  | 3.0  | 0.068 | 27.7 | 2.30E-03 |
| GO:0004970 | ionotropic glutamate receptor activity                     | 2  | 3.0  | 0.068 | 27.7 | 2.30E-03 |
| GO:0022838 | substrate specific channel activity                        | 5  | 7.6  | 0.070 | 3.1  | 2.10E-02 |
| GO:0005234 | extracellular-glutamate-gated ion channel activity         | 2  | 3.0  | 0.072 | 26.3 | 2.60E-03 |
| GO:0043167 | ion binding                                                | 23 | 34.8 | 0.076 | 1.4  | 5.40E-02 |
| GO:0015267 | channel activity                                           | 5  | 7.6  | 0.078 | 3.0  | 2.40E-02 |
| GO:0022803 | passive transmembrane transporter activity                 | 5  | 7.6  | 0.078 | 3.0  | 2.40E-02 |
| GO:0016192 | vesicle-mediated transport                                 | 6  | 9.1  | 0.079 | 2.6  | 2.90E-02 |
| GO:0004674 | protein serine/threonine kinase activity                   | 5  | 7.6  | 0.088 | 2.9  | 2.80E-02 |
| GO:0004672 | protein kinase activity                                    | 6  | 9.1  | 0.088 | 2.5  | 3.30E-02 |

---



**Supplementary Table S6.** KEGG Pathway enrichment of 70 aquatic adaptation genes. Over-represented GO terms were defined as having Fisher exact test  $P \leq 0.05$ .

| KEGG ID  | Description                     | Count | %   | P Value | Fold Enrichment | Fisher Exact Test P |
|----------|---------------------------------|-------|-----|---------|-----------------|---------------------|
| hsa04720 | Long-term potentiation          | 4     | 6.1 | 0.004   | 11.5            | 3.50E-04            |
| hsa04730 | Long-term depression            | 4     | 6.1 | 0.004   | 11.3            | 3.70E-04            |
| hsa00330 | Arginine and proline metabolism | 3     | 4.5 | 0.027   | 11.1            | 2.30E-03            |
| hsa04310 | Wnt signaling pathway           | 4     | 6.1 | 0.037   | 5.2             | 6.70E-03            |
| hsa04010 | MAPK signaling pathway          | 5     | 7.6 | 0.039   | 3.7             | 1.00E-02            |
| hsa04012 | ErbB signaling pathway          | 3     | 4.5 | 0.067   | 6.7             | 9.50E-03            |
| hsa04912 | GnRH signaling pathway          | 3     | 4.5 | 0.083   | 6.0             | 1.30E-02            |
